# Supplementary material for: NFATC2 Modulates Radiation Sensitivity in Dermal Fibroblasts From Patients With Severe Side Effects of Radiotherapy
Source: Front Oncol. 2020 Dec 16;10:589168. doi: 10.3389/fonc.2020.589168 (PMC7772431; doi:10.3389/fonc.2020.589168)
Supplement: Supplementary file 6 [file Table_2.xlsx]

## Sheet: Feuil1
Signaling pathway	Number of genes in the pathway	Number of differentially expressed genes	Adjusted p-value
Arrhythmogenic right ventricular cardiomyopathy (ARVC)	72	10	0.0065733
Basal cell carcinoma	63	7	0.23347
cAMP signaling pathway	199	13	0.29533
Wnt signaling pathway	146	10	0.44634
Hypertrophic cardiomyopathy (HCM)	83	7	0.44634
